# Supplementary material
Source: PubMed Central journal article supplement (PMC10529858)
Supplement: NIHMS1915132-supplement-2.pdf [file NIHMS1915132-supplement-2.pdf]

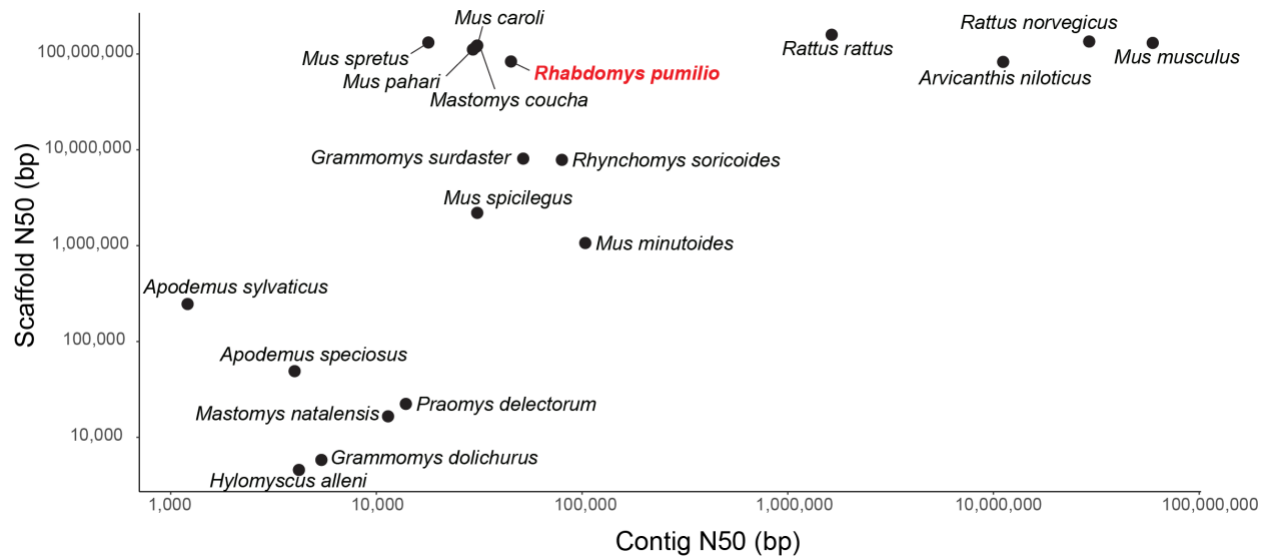

**Figure S1. Comparison of assembly contiguity among sequenced murine genomes. Related to Figure 1.**

Scaffold N50 in basepairs (bp) is plotted against contig N50 to indicate genome assembly contiguity. The African striped mouse genome has a high scaffold N50, comparable to that of other chromosome-scale murine genomes such as laboratory mice and rats. While contig N50 is somewhat less, the low gap percentage (~1%) indicates that only small breaks in contiguity are present within chromosome-scale scaffolds.

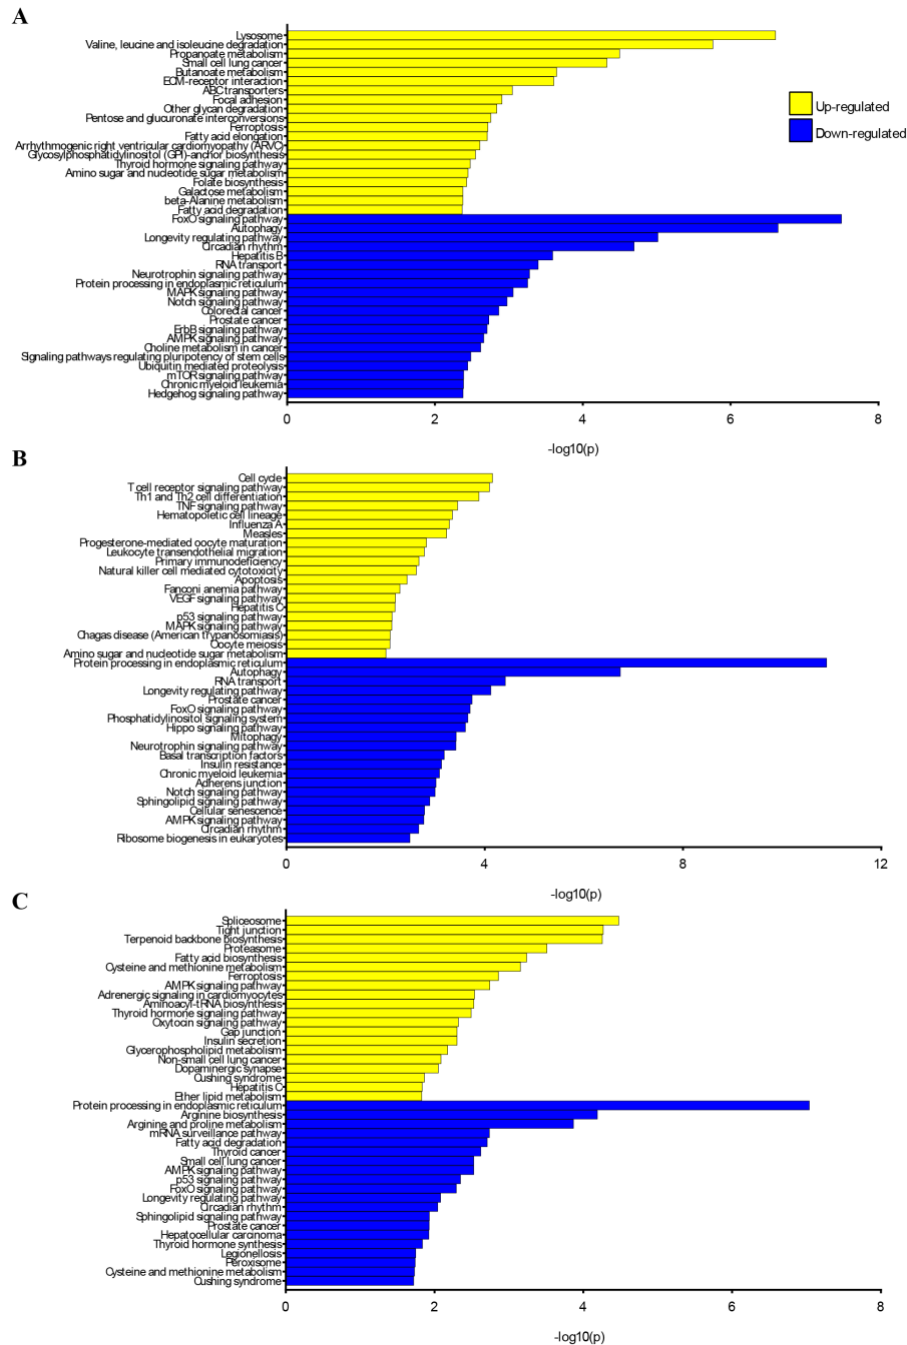

**Figure S2. Enriched KEGG pathways of genes in peripheral tissues in the night versus the day. Related to Figure 2.**

**A-C,** Overrepresentation analysis of up and down regulated DE genes ( $FDR < 0.05$ ;  $\log_2FC < 0$  or  $> 0$ ) in night versus day for retina (**A**), liver (**B**) and (**C**) lung samples using KEGG. The top 20 most significant up and down regulated pathways are shown for each tissue. The x-axis represents the enrichment value as the logarithm of the p-value. All represented pathways are significantly enriched, with a p-value  $< 0.05$ .

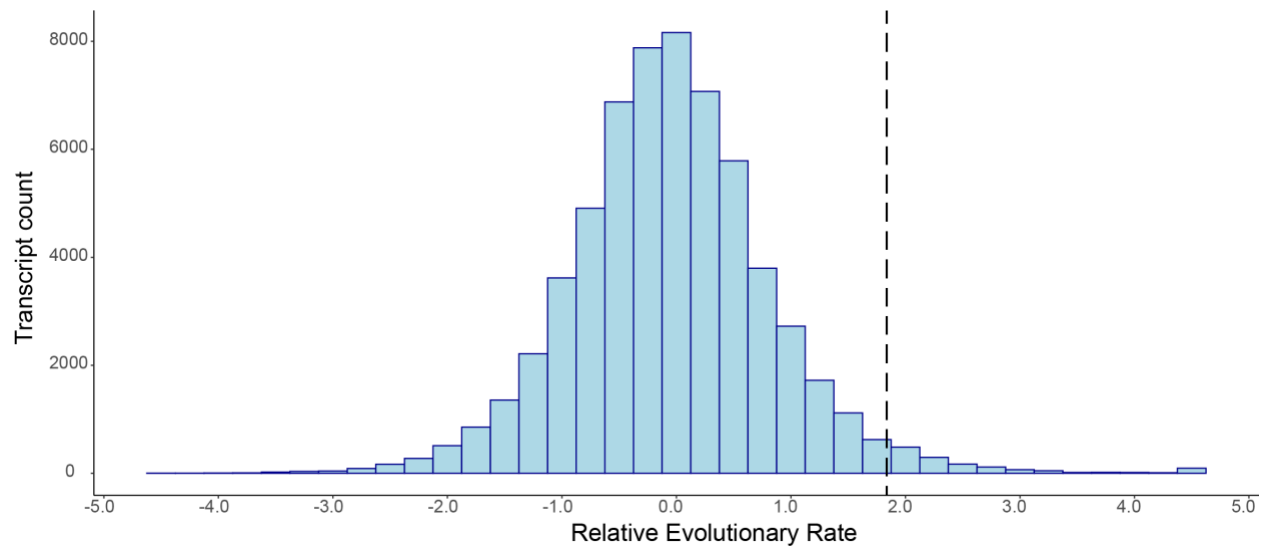

**Figure S3. Distribution of relative evolutionary rates in the African striped mouse exome. Related to Figure 3.**

Relative evolutionary rates, taken as the residual length of branches in scaled gene trees relative to the average tree for the exome, are shown as a histogram. Striped mouse accelerated loci were defined as the 95<sup>th</sup> percentile of loci with positive relative evolutionary rates.

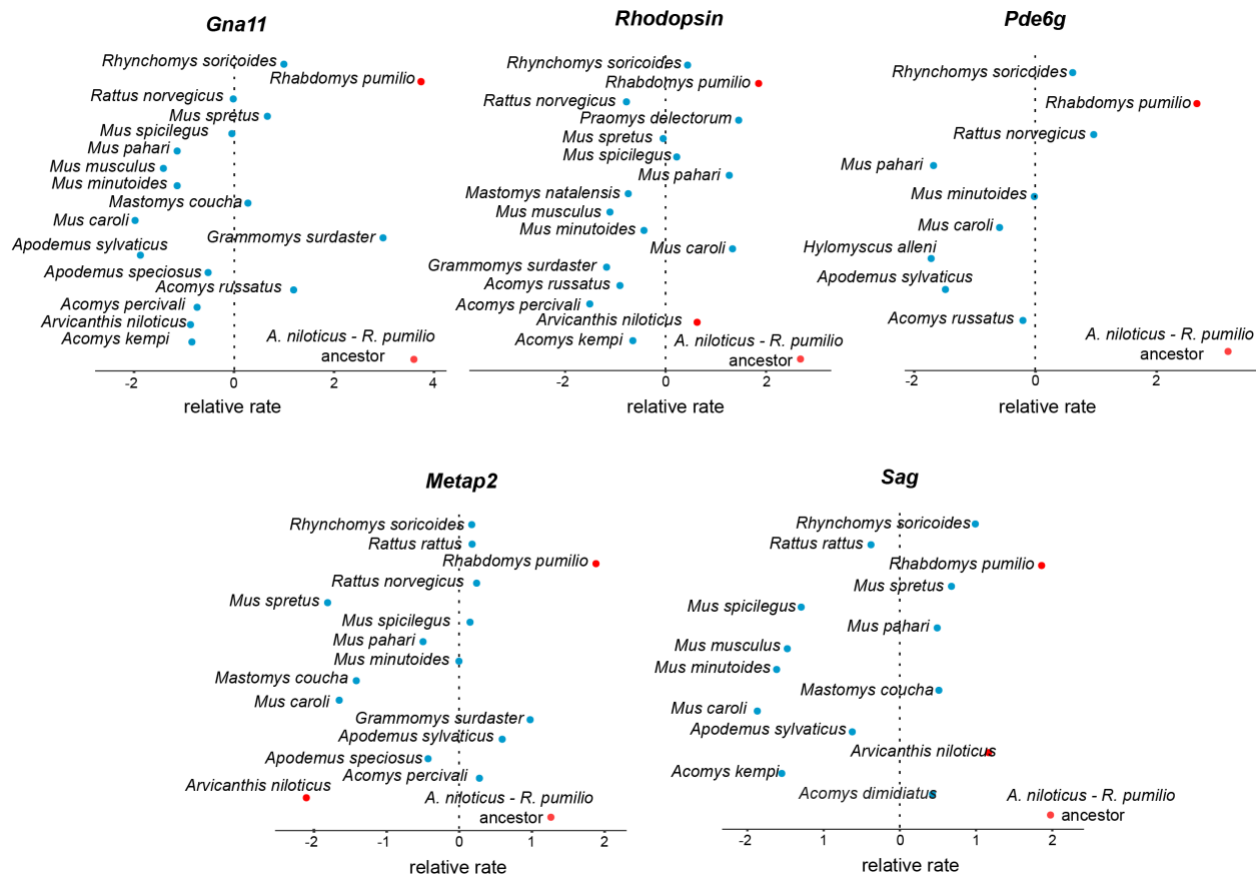

**Figure S4. Relative evolutionary rates of additional phototransduction genes. Related to Figure 3.**

Relative evolutionary rates of striped mouse accelerated loci (red) involved in rhodopsin-mediated phototransduction are compared to their orthologs in other murids (blue).
